# Supplementary material for: The Caltech Photooxidation Flow Tube Reactor – I: Design andFluid Dynamics
Source: Copernicus journal article supplement (doi:10.5194/amt-2016-282), 2016-09-22
Supplement: Supplementary file [file amt-2016-282-SC1-supplement.pdf]

### Short comment on the review of Huang et al.

In one of the reviews of this paper, a figure comparing residence time distributions of several reactors was shown. The figure had originally been presented by our group at the recent PAM Users meeting in Oct. 2016 (<https://sites.google.com/site/pamwiki/home/4th-pam-users-meeting>). We have since realized that one of the traces contained an error. For the record we reproduce below a proper comparison between the PAM and Caltech flow reactors, as well as the theoretical laminar profile:

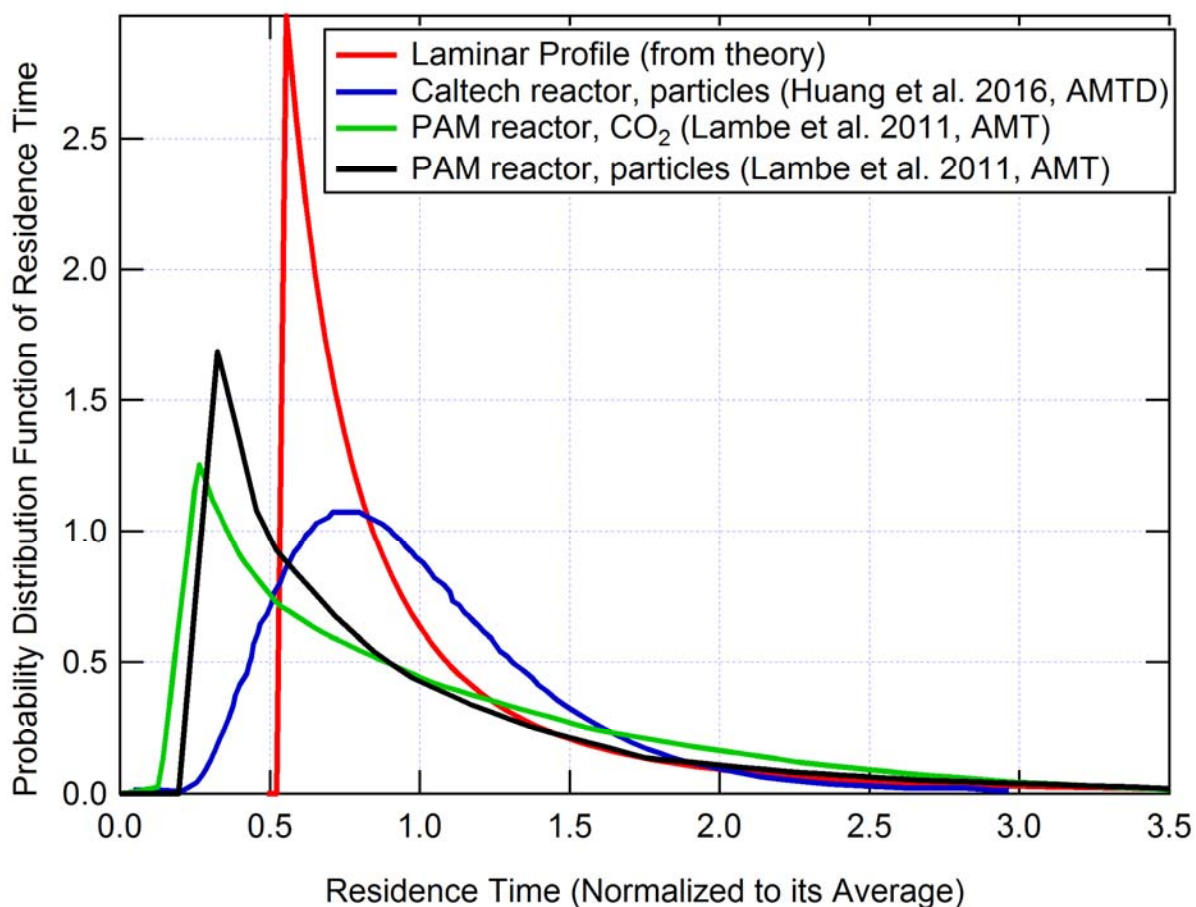

**Figure 1.** Comparison of the probability density functions of residence times for different flow reactors, as a function of normalized residence time.

This comparison does not affect the conclusions of the present paper and should not delay its publication.

The plot above is available in Igor format at the following web page, with the hope that it can serve as a point of comparison for RTDs measured by others for these and other reactors:

<https://sites.google.com/site/pamwiki/hardware/estimation-equations>
